# Effects of Forest Age on Soil Autotrophic and Heterotrophic Respiration Differ between Evergreen and Deciduous Forests

Wei Wang<sup>1\*</sup>, Wenjing Zeng<sup>1</sup>, Weile Chen<sup>1</sup>, Yuanhe Yang<sup>3</sup>, Hui Zeng<sup>2</sup>

**1** Department of Ecology, College of Urban and Environmental Sciences, and Key Laboratory for Earth Surface Processes of the Ministry of Education, Peking University, Beijing, China, **2** Shenzhen Graduate School, Key Laboratory for Urban Habitat Environmental Science and Technology, Peking University, Shenzhen, China, **3** Institute of Botany, The Chinese Academy of Sciences, Beijing, China

## Abstract

We examined the effects of forest stand age on soil respiration (SR) including the heterotrophic respiration (HR) and autotrophic respiration (AR) of two forest types. We measured soil respiration and partitioned the HR and AR components across three age classes ~15, ~25, and ~35-year-old *Pinus sylvestris* var. *mongolica* (Mongolia pine) and *Larix principis-rupprechtii* (larch) in a forest-steppe ecotone, northern China (June 2006 to October 2009). We analyzed the relationship between seasonal dynamics of SR, HR, AR and soil temperature (ST), soil water content (SWC) and normalized difference vegetation index (NDVI, a plant greenness and net primary productivity indicator). Our results showed that ST and SWC were driving factors for the seasonal dynamics of SR rather than plant greenness, irrespective of stand age and forest type. For ~15-year-old stands, the seasonal dynamics of both AR and HR were dependent on ST. Higher  $Q_{10}$  of HR compared with AR occurred in larch. However, in Mongolia pine a similar  $Q_{10}$  occurred between HR and AR. With stand age,  $Q_{10}$  of both HR and AR increased in larch. For Mongolia pine,  $Q_{10}$  of HR increased with stand age, but AR showed no significant relationship with ST. As stand age increased, HR was correlated with SWC in Mongolia pine, but for larch AR correlated with SWC. The dependence of AR on NDVI occurred in ~35-year-old Mongolia pine. Our study demonstrated the importance of separating autotrophic and heterotrophic respiration components of SR when stimulating the response of soil carbon efflux to environmental changes. When estimating the response of autotrophic and heterotrophic respiration to environmental changes, the effect of forest type on age-related trends is required.

**Citation:** Wang W, Zeng W, Chen W, Yang Y, Zeng H (2013) Effects of Forest Age on Soil Autotrophic and Heterotrophic Respiration Differ between Evergreen and Deciduous Forests. PLoS ONE 8(11): e80937. doi:10.1371/journal.pone.0080937

**Editor:** Dafeng Hui, Tennessee State University, United States of America

**Received:** July 10, 2013; **Accepted:** October 7, 2013; **Published:** November 25, 2013

**Copyright:** © 2013 Wang et al. This is an open-access article distributed under the terms of the Creative Commons Attribution License, which permits unrestricted use, distribution, and reproduction in any medium, provided the original author and source are credited.

**Funding:** This research was supported by the National Basic Research Program of China (No. 2010CB950600 and 2013CB956303), the Projects of National Natural Science Foundation of China (No. 31222011, 31270363 and 31070428) and supported by the Foundation for Innovative Research Groups of the National Natural Science Foundation of China (No. 31021001). The funders had no role in study design, data collection and analysis, decision to publish, or preparation of the manuscript.

**Competing Interests:** The authors have declared that no competing interests exist.

\* E-mail: wangw@urban.pku.edu.cn

## Introduction

Forest soil respiration (SR) is the primary pathway where plant-fixed CO<sub>2</sub> is released into the atmosphere [1–3]. This occurs from the root activity and their associated mycorrhizal fungi (below-ground autotrophic respiration, AR) and from heterotrophic respiration (HR) [4,5]. Quantifying forest SR, AR and HR components and their environmental controls requires an accurate evaluation of the response of the terrestrial carbon balance to future climate changes [8–10], based on the large annual exchange of carbon between forest ecosystems and the atmosphere [6,7].

Forest age was reported to play an important role in determining the distribution of ecosystem carbon pools, fluxes and carbon sequestration [11–13]. Forest stands of various ages evolve with different abiotic and biotic environments that can differentially respond to environmental changes [14]. Older stands accumulate aboveground litter and root inputs, possibly decreasing HR and increasing AR [15]. Soil carbon dynamics may become more complex with increasing stand age [16]. For instance, the Great Lakes forest chronosequence showed that

changes in soil carbon stocks across different aged stands had different patterns, with old-growth stands accumulating carbon in the deep soil layers, but not surface soils [16]. Our limited knowledge in forest succession and carbon cycles has resulted in few large-scale ecosystem carbon models accounting for the change of forest metabolic rates with age [17]. To model the long-term forest carbon dynamics and its coupling with the climate system, we need to understand the response of forest ecosystems to the changing climate, including the role of stand age and the successional status on carbon dynamics [16].

Previous studies on the effect of stand age on forest carbon efflux focused on the measurements of total SR in a single forest type. Researchers have observed that total SR increased [18,19], decreased [15,20], was similar [21,22] or responded non-linearly [23,24] with forest age. However, the effect of forest age on SR may depend on the forest type [25]. For instance, deciduous forests are time-limited each year to photosynthesize and allocate carbon to storage and reproduction compared with evergreen forests [26]. These physiological and phenological differences between deciduous and evergreen forests [27] may modulate the SR response

across different aged stands to environmental changes. Additionally, AR and HR may respond differently to environmental changes [28]. AR is strongly influenced by photosynthetic activity compared with HR [28,29,30,31]. Therefore, the ratio of AR and HR (of total SR) will modulate the response of SR across different aged stands to environmental changes [32,33]. For instance, Jassal *et al.* (2012) observed that SR in younger stands (~21 years) was more responsive to soil temperature (ST) and soil water content (SWC) compared with older stands (~60 years) [34]. We measured SR and partitioned the HR and AR components across three age classes (~15, ~25, and ~35 years) for the evergreen species, *Pinus sylvestris* var. *mongolica* (Mongolia pine) and the deciduous species, *Larix principis-rupprechtii* (larch) from June 2006 to October 2009 in a forest-steppe ecotone, northern China. We analyzed the relationships between SR, HR, AR and ST, SWC and NDVI (normalized difference vegetation index, indicative of plant greenness and net primary productivity). Our objective was to determine if forest type modulated the seasonal dynamics of SR and the AR and HR components and their responses to ST, SWC and NDVI across different aged stands. We tested the following hypotheses: (1) ST, SWC and NDVI will have significant effects on the seasonal dynamics of SR across varied aged stands, irrespective of forest type. This was based on the findings that SR depended on ST, SWC [35,36] and primary productivity [29,37]; (2) HR is more sensitive to ST and SWC than AR, irrespective of forest type. AR is controlled by NDVI, depending on stand age and forest type. The dependence of AR on NDVI was expected to decrease with stand age, because of the perennial life cycle, long carbon transport pathways and high storage capacity in older trees. However, AR dependence on NDVI may increase from deciduous to evergreen forest because of the greater dependence on seasonal accumulation and consumption of stored carbon in deciduous rather than evergreen forest [38].

## Materials and Methods

### Ethics Statement

The administration of the Saihanba Forestry Center gave permission for this research at each study site. We confirm that the field studies did not involve endangered or protected species.

### Site description

The study was conducted at Saihanba Forestry Center, Hebei Province, northern China (117°12'–117°30' E, 42°10'–42°50' N, 1400 m a.s.l.) adjacent to the Beijing-Tianjin region. Our study site lay within a typical forest-steppe ecotone in a temperate region. The climate is semi-arid, semi-humid, with long cold winters (November to March) and a short spring and summer. The annual mean air temperature and precipitation from 1964 to 2004 were  $-1.4^{\circ}\text{C}$  and 450.1 mm, respectively. The soils are predominantly sandy, accompanied by meadow and marsh-type. The soil has low nutrient content with the organic carbon levels at 0.71–1.88% and total nitrogen at 0.08–0.19%. The bulk density ranged from 0.74 to 1.06  $\text{g cm}^{-3}$  with litter and fine root biomass increasing with stand age (Table 1). Primary forests were harvested using large-scale industrial logging techniques in the late 1900s. This area has been threatened from sandstorm since the 1950s. Consequently, the China Forestry Administration proposed the establishment of a large plantation in Saihanba to ensure the environmental safety of the Beijing-Tianjin region. Saihanba forestry was established in 1962 with the plantation now 94,700  $\text{hm}^2$ , covering 76.8% of the area. This project has been the largest one in China with *P. sylvestris* var. *mongolica* (Mongolia pine) and *L. principis-rupprechtii* (larch) the most dominant species.

**Table 1.** Site characteristics of the six forest stands in this study.

| Forest stands                                 | Stand age (years) | Tree height (m) | DBH (cm) | Slope/aspect | Elevation (a.s.l.) | Soil texture | Tree density (stem $\text{ha}^{-1}$ ) | SOC (%) | STN (%) | SBD ( $\text{g cm}^{-3}$ ) | LFB ( $\text{g m}^{-2}$ ) | FRB ( $\text{g m}^{-2}$ ) |
|-----------------------------------------------|-------------------|-----------------|----------|--------------|--------------------|--------------|---------------------------------------|---------|---------|----------------------------|---------------------------|---------------------------|
| <i>Larix principis-rupprechtii</i>            | ~15               | 3.34            | 3.1      | 0°/–         | 1582               | Sandy soil   | 1900                                  | 0.94    | 0.09    | 1.06                       | 1360                      | 191                       |
|                                               | ~25               | 9.47            | 11.1     | 0°/–         | 1560               | Sandy soil   | 2133                                  | 0.95    | 0.10    | 0.88                       | 2207                      | 198                       |
|                                               | ~35               | 15.67           | 21.4     | 0°/–         | 1500               | Sandy soil   | 1825                                  | 1.88    | 0.18    | 0.74                       | 3412                      | 220                       |
| <i>Pinus sylvestris</i> var. <i>mongolica</i> | ~15               | 2.70            | 4.3      | 1°/S         | 1509               | Sandy soil   | 1800                                  | 0.71    | 0.08    | 0.98                       | 1335                      | 344                       |
|                                               | ~25               | 8.02            | 12.0     | 2°/S         | 1519               | Sandy soil   | 2010                                  | 1.27    | 0.13    | 0.83                       | 2798                      | 483                       |
|                                               | ~35               | 14.70           | 20.7     | 1°/S         | 1502               | Sandy soil   | 1760                                  | 1.60    | 0.19    | 0.85                       | 2899                      | 496                       |

DBH = Diameter at Breast Height (1.3 m); NDVI = Normalized Difference Vegetation Index; SOC = Soil Organic Carbon; STN = Soil Total Nitrogen; SBD = Soil Bulk Density; LFB = Litter Floor Biomass; FRB = Fine Root Biomass. doi:10.1371/journal.pone.0080937.t001

## Experimental design

To assess the effects of forest age on soil respiration (SR), autotrophic respiration (AR) and heterotrophic respiration (HR) across different forest types, we selected six stands with the same planting density (4995 stem/ha), including three age classes of Mongolia pine and larch. These were pure plantations established on former meadow grassland dominated by *Leymus chinensis*. In combination, these stands made up a chronosequence from 15 to 35 years old, with the oldest stand ready for intermediate cutting. Neither fertilization nor drainage works had been carried out since tree establishment in any of the stands. Moreover, the topography at all six stands is predominantly flat with a similar slope, position and elevation (Table 1). The selected Mongolia pine plantation has a stand area of 1.25 ha (15 years old), 5 ha (25 years old) and 10.14 ha (35 years old). The selected larch plantation had a stand area of 1.05 ha (15 years old), 3.67 ha (25 years old) and 5.11 ha (35 years old). The locations of the stands with different stand ages are shown in Figure 1. Detailed stand information is shown in Table 1. For each stand, three replicate plots were arranged in an area of 20 m×20 m. Five subsamples (i.e. SR collars) were randomly arranged in each plot. The distance between any two stands was ≤10 km, avoiding differences in climate and soil type. Stand age was obtained from forest management records and from core samples using an increment borer. Similar climate and soil properties among these stands create an ideal chronosequence to study age effects on soil carbon efflux.

## Soil respiration (SR), soil temperature (ST) and water content (SWC)

SR was measured from June 2006 to October 2009 using a Li-8100 soil CO<sub>2</sub> flux system (LI-COR Inc., Lincoln, NE, USA). During the growing season, five polyvinyl chloride (PVC) collars (10 cm inside diameter, 6 cm height) were inserted 3 cm into the soil in each plot and left *in situ* throughout the study. The five PVC collars were placed in each plot, one in each of the four corners and the fifth in the middle. Live plants inside the collars were clipped at the soil surface 1 day before each measurement. SR was measured every 15–20 days. To minimize the daily variation in

SR and represent the daily mean, measurements were made between 0800 and 1100 h [39,40]. For each measurement, the respiration rate was calculated as the mean of three plots per stand. During winter, longer soil collars (determined by snow depth, commonly >30 cm) were inserted into the soil surface and stabilized for 24 h before the SR measurement [41,42]. The duration of winter at our site was 5 months from November to late March with near consistent, continuous mean daily soil temperature <0.5°C at 5 cm [43]. The Li-8100 soil CO<sub>2</sub> flux system was kept in an isolated/heated container to maintain the temperature above freezing. Winter SR was measured monthly except in February.

During respiration measurements, ST was recorded in each collar at 5 cm soil depth with the Li-8100 temperature probe. Continuous measurements of ST were recorded at 30-min intervals with StowAway loggers (Onset Comp. Corp., Bourne, MA, USA) inserted in the soil at each site. SWC at 0–10 cm was measured inside the collars using time domain reflectometry (Soil moisture Equipment Corp., Santa Barbara, CA, USA). No data for SWC were obtained during the winter because the probe could not be fully inserted into the frozen soil.

## Harmonic analysis of time-series AVHRR normalized difference vegetation index (NDVI) dataset

NDVI is derived from the red: near-infrared reflectance ratio:

$$NDVI = \frac{(NIR - VIS)}{(NIR + VIS)} \quad (1)$$

where NIR and VIS represent the spectral reflectance measurements acquired in the near-infrared and visible (red) regions, respectively [44]. Due to their large areas, uniform distribution and sparse understory of both Mongolia pine and larch plantations, the NDVI of 16-Day L3Global 250 m product (MOD13 Q1) could well represent our plot measurements. We acquired the data from June 2006 to October 2009 using the website <https://wist.echo.nasa.gov/api>.

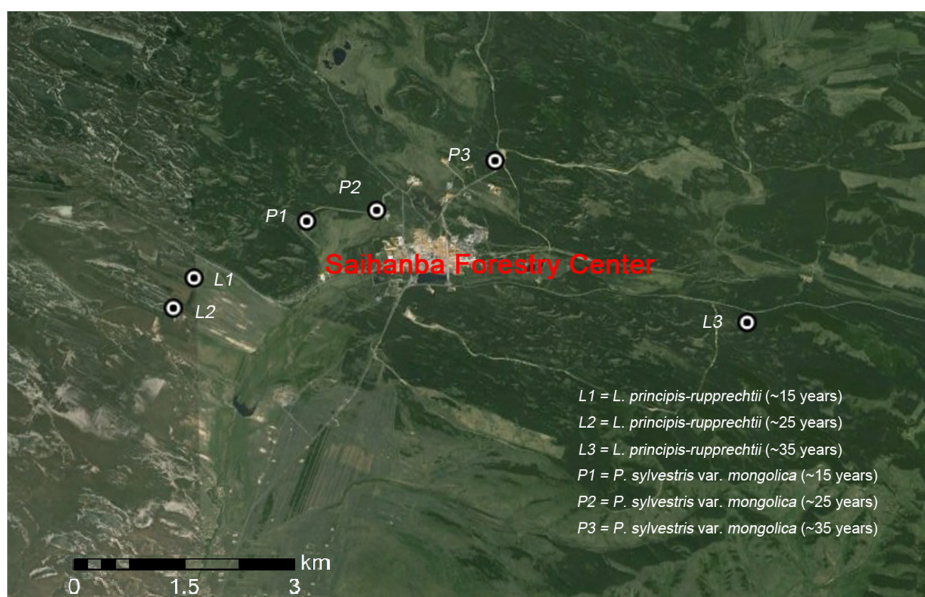

**Figure 1. Location of sites showing different aged stands.**  
 doi:10.1371/journal.pone.0080937.g001

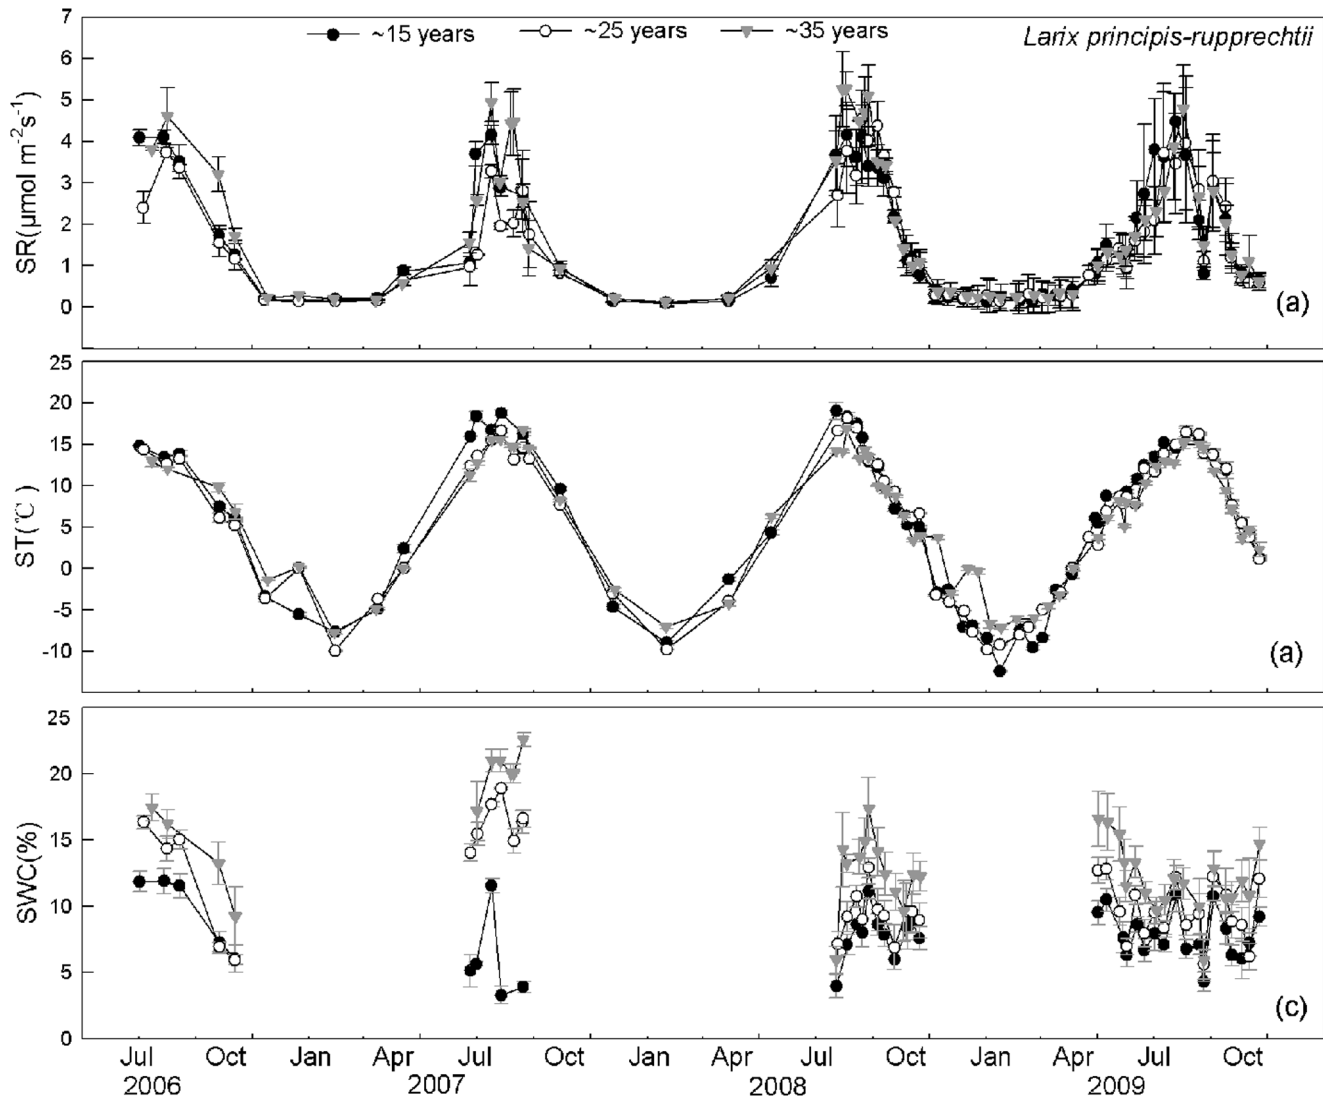

**Figure 2. Seasonal changes of soil respiration (SR) and environmental factors across three stand ages of *Larix principis-rupprechtii*.** SR (a), soil temperature at 5 cm depth (ST) (b) and soil water content at 10 cm depth (SWC) (c) are shown from June 2006 to October 2009. doi:10.1371/journal.pone.0080937.g002

Harmonic (Fourier) analysis was used to remove the excess noise remaining in the NDVI time-series from satellite-borne data sources and to obtain reasonably smooth continuous daily data [45]. The Fourier series analysis decomposes a signal into an infinite series of harmonic components. Each of these components is composed initially of a sine wave and a cosine wave of equal integer frequency. These two waves are then combined into a single cosine wave with a characteristic amplitude (size of the wave) and phase angle (offset of the wave) [46,47].

#### Heterotrophic respiration (HR) and autotrophic respiration (AR)

To detect the response of HR and AR to environmental changes, five additional soil collars per plot were placed with deep PVC collars (80 cm<sup>2</sup> and 70 cm deep) in October 2006. The 70-cm-long PVC collars isolated old plant roots, preventing new roots from growing inside the collars. This method has been successfully applied in various ecosystems to separate HR from the total SR [48–50].

To examine the transient response of dead root decomposition, we commenced the CO<sub>2</sub> efflux measurements above the PVC tubes immediately after installation. The interference of installation was eliminated after 1.5 years (from 2006) with the soil CO<sub>2</sub> efflux measured at the stands believed to represent HR. AR was calculated as the difference between SR and HR.

#### SR, its HR and AR components and their relationships with ST, SWC and NDVI

We examined the relationships between SR, HR, AR and ST by fitting exponential functions to the data from each stand using the following equation:

$$R = R_0 e^{\beta t} \quad (2)$$

where  $R$  is observed SR (plot-wide averages measured periodically throughout the year),  $t$  is the concurrent ST (5 cm depth), with  $R_0$  being the basal respiration at temperature of 0°C and  $\beta$  the fitted parameters obtained using least squares nonlinear regression with

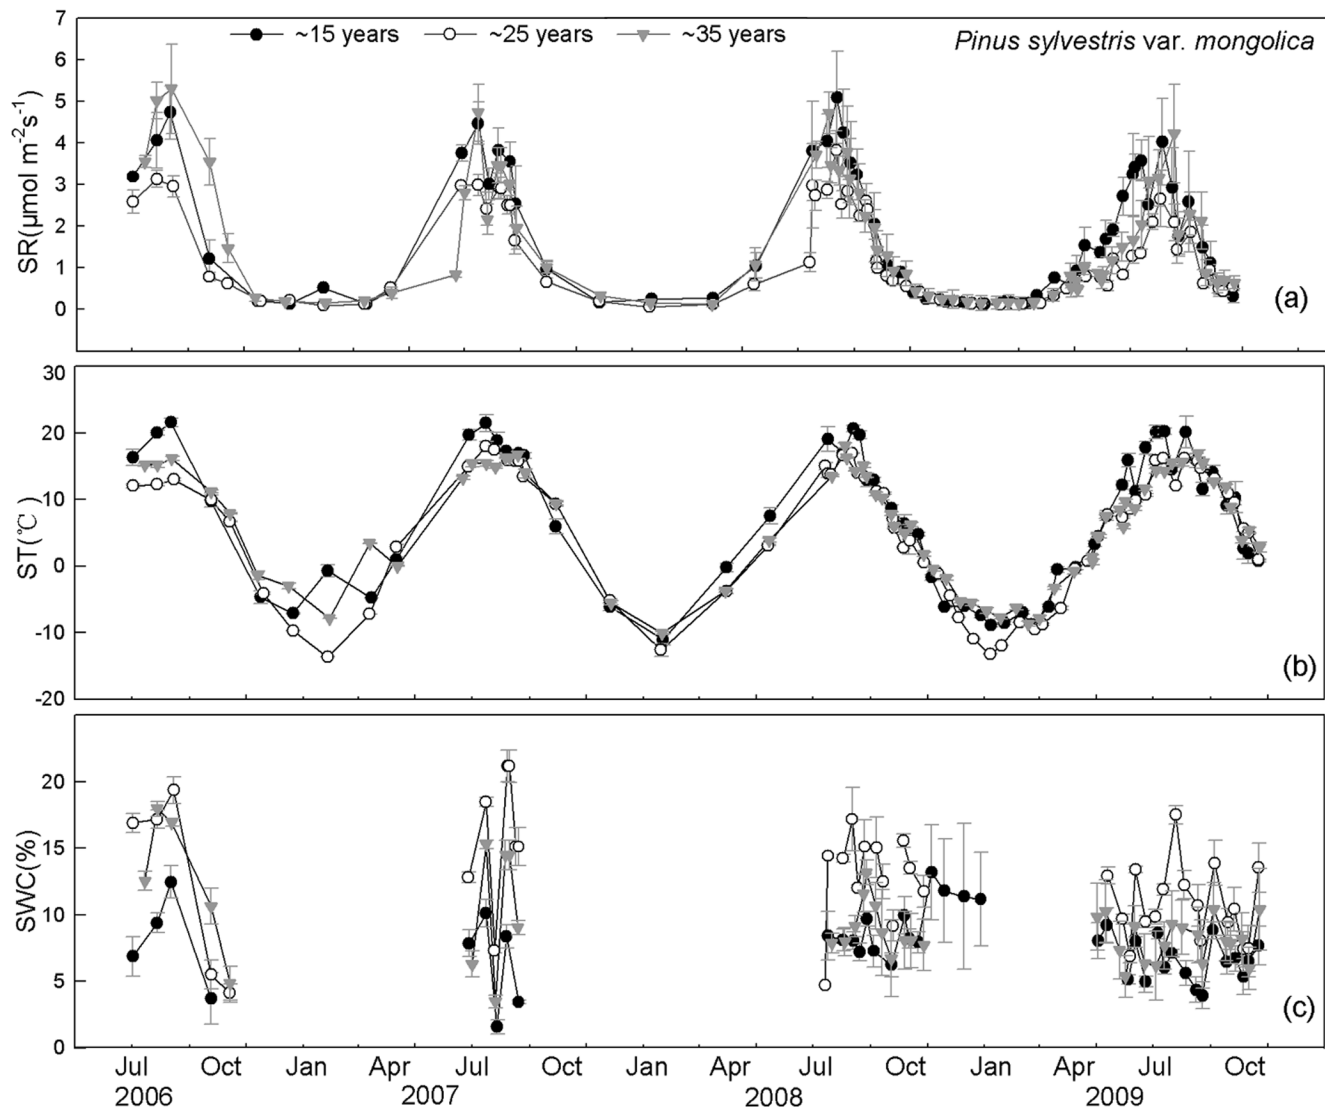

**Figure 3. Seasonal changes of soil respiration (SR) and environmental factors across three stand ages of *Pinus sylvestris*.** SR (a), soil temperature at 5 cm depth (ST) (b) and soil water content at 10 cm depth (SWC) (c) are shown from June 2006 to October 2009. doi:10.1371/journal.pone.0080937.g003

SigmaPlot V. 8.02. The  $\beta$  values were used to calculate apparent  $Q_{10}$  values, which describes the change in respiration rate over a  $10^{\circ}\text{C}$  increase in  $t$  using:

$$Q_{10} = e^{10\beta} \quad (3)$$

In addition, we calculated  $R_{15}$ , the respiration values at a reference temperature of  $15^{\circ}\text{C}$  (without stimulation introduced by photosynthetic activity and without water limitations) [51] according to equation 4, using a  $Q_{10}$  coefficient calculated from equation (3). To remove the effect of ST, we examined the relationships between  $R_{15}$  and SWC and NDVI.

$$R_{15} = RQ_{10}^{(15-T)/10} \quad (4)$$

where  $R_{15}$  is the respiration flux at a constant temperature of  $15^{\circ}\text{C}$ ,  $R$  the measured respiration rate,  $Q_{10}$  from equation (3) and  $T$  the ST at a 5 cm depth.

### Statistical analysis

To evaluate if SR, HR and AR significantly differed among different aged stands, forest type and measurement time, we used a three-way ANOVA. The relationships between SR, HR, AR and ST, SWC and NDVI were examined using regression analysis. All statistical analyses were performed with a significance level of 0.05 using SPSS (2009, ver. 18.0, SPSS Inc., Chicago, IL, USA).

## Results

### Seasonal dynamics of soil respiration (SR)

SR was significantly different among the different time measurements, irrespective of stand age and forest type (Table 2). SR was higher in summer and lower in winter, following the seasonal dynamics of ST, irrespective of stand age and forest type (Figs. 2, 3). Across different aged stands, the seasonal dynamics of SR were exponentially related to ST, possibly explaining the 88%–89% and 89%–95% variation in SR for larch and Mongolia pine, respectively (means for 4 years' measurements, Table 3). Apparent  $Q_{10}$  of SR across three stand ages ranged from 3.49–



**Table 2.** Results of the three-way ANOVA with soil respiration (SR), heterotrophic respiration (HR) and autotrophic respiration (AR) as the response variables respectively, and stand age (~15 years, ~25 years and ~35 years for SR, ~15 years and ~35 years for HR and AR), forest type (*Larix principis vs. Pinus sylvestris*) and measurement time (from June 2006 to October 2009 for SR, from August 2008 to August 2009 for HR and AR) as factors.

| Factor                         | SR   |             |             |       |       | HR   |             |             |       |       | AR   |             |             |        |       |
|--------------------------------|------|-------------|-------------|-------|-------|------|-------------|-------------|-------|-------|------|-------------|-------------|--------|-------|
|                                | d.f. | Type III SS | Mean square | F     | P     | d.f. | Type III SS | Mean square | F     | P     | d.f. | Type III SS | Mean square | F      | P     |
| stand age                      | 2    | 11.872      | 5.936       | 2.975 | 0.052 | 1    | 0.351       | 0.351       | 0.426 | 0.516 | 1    | 0.418       | 0.418       | 1.258  | 0.266 |
| forest type                    | 1    | 0.423       | 0.423       | 0.212 | 0.646 | 1    | 0.774       | 0.774       | 0.94  | 0.336 | 1    | 5.047       | 5.047       | 15.192 | <0.01 |
| time                           | 3    | 34.367      | 11.456      | 5.741 | <0.01 | 1    | 3.469       | 3.469       | 4.211 | <0.05 | 1    | 1.289       | 1.289       | 3.879  | 0.053 |
| stand age × forest type        | 2    | 2.071       | 1.035       | 0.519 | 0.596 | 1    | 0.012       | 0.012       | 0.015 | 0.904 | 1    | 2.344       | 2.344       | 7.056  | <0.01 |
| stand age × time               | 6    | 4.808       | 0.801       | 0.402 | 0.878 | 1    | 1.202       | 1.202       | 1.459 | 0.231 | 1    | 0.338       | 0.338       | 1.017  | 0.317 |
| forest type × time             | 3    | 3.716       | 1.239       | 0.621 | 0.602 | 1    | 0.064       | 0.064       | 0.078 | 0.781 | 1    | 1.336       | 1.336       | 4.021  | <0.05 |
| stand age × forest type × time | 6    | 2.39        | 0.398       | 0.2   | 0.977 | 1    | 0.771       | 0.771       | 0.935 | 0.337 | 1    | 0.11        | 0.11        | 0.332  | 0.567 |

The data in ~25-year-old stands were absent because of the artificially damaged collars for separating AR and HR during the experiments.  
doi:10.1371/journal.pone.0080937.t002

**Table 3.** Q<sub>10</sub> of soil respiration (SR), basal respiration rate (R<sub>0</sub>) and determination coefficient of exponential relationships between SR and soil temperature (ST), using SR = R<sub>0</sub> × e<sup>βT</sup>. L1, L2, L3 are ~15 years, ~25 years and ~35 years *Larix principis* stand, respectively.

|    | 2006           |      |                 |                |                | 2007 |                 |                |                |      | 2008            |                |                |      |                 | 2009           |                |      |                 |                |
|----|----------------|------|-----------------|----------------|----------------|------|-----------------|----------------|----------------|------|-----------------|----------------|----------------|------|-----------------|----------------|----------------|------|-----------------|----------------|
|    | R <sub>0</sub> | β    | Q <sub>10</sub> | R <sup>2</sup> | R <sub>0</sub> | β    | Q <sub>10</sub> | R <sup>2</sup> | R <sub>0</sub> | β    | Q <sub>10</sub> | R <sup>2</sup> | R <sub>0</sub> | β    | Q <sub>10</sub> | R <sup>2</sup> | R <sub>0</sub> | β    | Q <sub>10</sub> | R <sup>2</sup> |
| L1 | 0.40           | 0.17 | 5.37            | 0.99           | 0.39           | 0.11 | 3.06            | 0.90           | 0.43           | 0.14 | 4.06            | 0.91           | 0.48           | 0.12 | 3.25            | 0.90           | 0.45           | 0.13 | 3.53            | 0.89           |
| L2 | 0.29           | 0.18 | 6.30            | 0.87           | 0.37           | 0.12 | 3.22            | 0.91           | 0.49           | 0.14 | 3.97            | 0.94           | 0.50           | 0.11 | 3.10            | 0.90           | 0.45           | 0.13 | 3.49            | 0.88           |
| L3 | 0.31           | 0.22 | 8.94            | 0.98           | 0.40           | 0.14 | 3.86            | 0.91           | 0.41           | 0.18 | 5.87            | 0.92           | 0.52           | 0.13 | 3.56            | 0.93           | 0.46           | 0.15 | 4.31            | 0.89           |
| P1 | 0.35           | 0.13 | 3.49            | 1.00           | 0.38           | 0.12 | 3.35            | 0.97           | 0.50           | 0.12 | 3.25            | 0.94           | 0.42           | 0.11 | 3.10            | 0.95           | 0.43           | 0.12 | 3.19            | 0.95           |
| P2 | 0.45           | 0.12 | 3.39            | 0.85           | 0.37           | 0.12 | 3.29            | 0.97           | 0.46           | 0.12 | 3.46            | 0.91           | 0.35           | 0.10 | 2.72            | 0.91           | 0.40           | 0.11 | 3.10            | 0.89           |
| P3 | 0.36           | 0.17 | 5.53            | 0.98           | 0.38           | 0.12 | 3.39            | 0.85           | 0.50           | 0.14 | 3.94            | 0.94           | 0.39           | 0.12 | 3.35            | 0.94           | 0.42           | 0.13 | 3.67            | 0.90           |

P1, P2, P3 are ~15 years, ~25 years and ~35 years *Pinus sylvestris* stand, respectively.  
doi:10.1371/journal.pone.0080937.t003

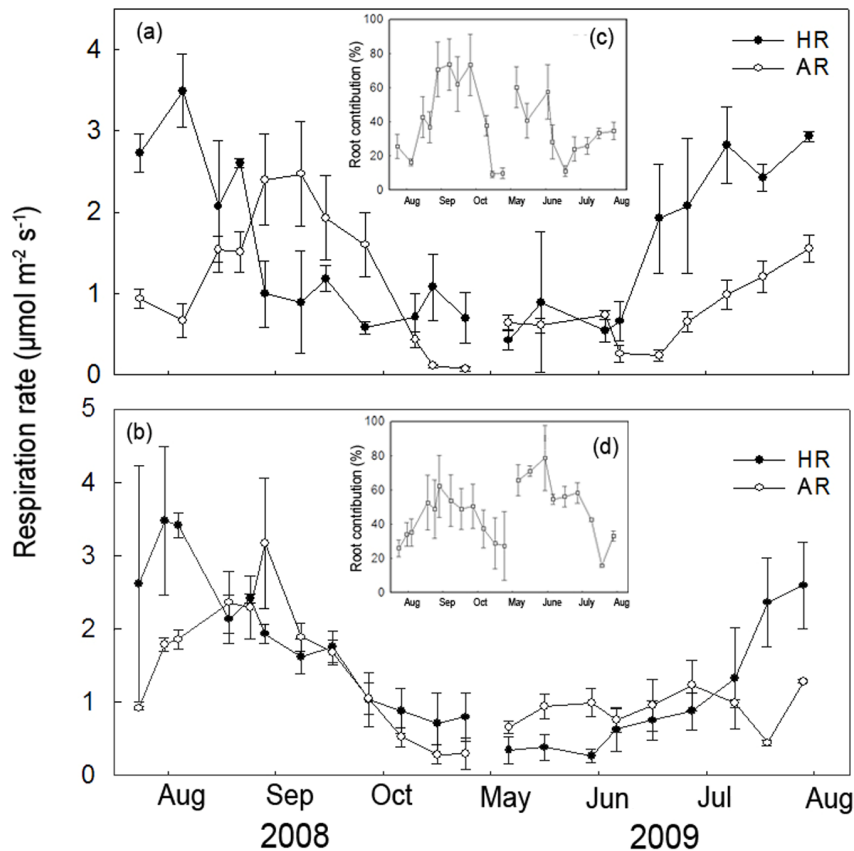

**Figure 4. Seasonal changes in autotrophic and heterotrophic components of soil respiration (SR) for different aged stands of *Larix principis*.** Autotrophic respiration (AR) and heterotrophic respiration (HR) in ~15-year-old (a) and ~35-year-old stands (b) are shown from August 2008 to August 2009. Seasonal changes in the contribution of AR to SR are shown in inserted figures for ~15-year-old (c) and ~35-year-old (d) stands. The data in the ~25-year-old stand were absent because of the artificially damaged collars for separating AR and HR during the experiments. doi:10.1371/journal.pone.0080937.g004

4.31 and 3.10–3.67 for larch and Mongolia pine, respectively (means of 4 years' measurements, Table 3). Apparent  $Q_{10}$  of ~35-year-old stand was significantly higher compared with ~15 and ~25-year-old stands, irrespective of forest type (Table 3). Soil basal respiration ( $R_0$ ) was similar across three stand ages of both forest types (Table 3).

$SR_{15}$  showed no significant relationship with NDVI, irrespective of forest age and type ( $P > 0.05$  for all stands, Fig. S1). Conversely, a significant correlation was found between  $SR_{15}$  and SWC, which could explain the variation of 15%–26% and 10%–33% variation for larch and Mongolia pine, respectively (Fig. S2).

### Seasonal dynamics of heterotrophic respiration (HR) and autotrophic respiration (AR)

HR was significantly different among different time measurements, irrespective of stand age and forest type (Table 2). The seasonal dynamics of HR were similar across different aged stands, showing higher values in summer and lower in spring and autumn (Figs. 4, 5). However, AR showed a more variable pattern. For larch, maximal AR occurred in early September with minimal values in late October, irrespective of stand age (Fig. 4a, 4b). The contribution of AR to total SR ranged from 9%–74% and 16%–79% (~15 and ~35-year-old-stands, respectively; Fig. 4c and d). HR, AR and the contribution of AR to total SR showed no significant differences between ~15 and ~35-year-old larch ( $P > 0.05$  for all the comparisons, Table 2). For Mongolia pine,

AR peaked in early August and late August (~15 and ~35-year-old-stands, respectively), with minimum AR in late October for both stands (Fig. 5a, 5b). The contribution of AR to total SR ranged from 16%–63% (Fig. 5c) for ~15 and 8%–79% for ~35-year-old stands (Fig. 5d). AR and the contribution of AR to total SR was significantly lower in the ~35 compared with ~15-year-old stand (39% vs. 22%;  $P < 0.05$ ). HR showed no significant differences between the two stands ( $P > 0.05$ , Table 2). AR was significantly different between the two forest types, with a significant interaction effect among forest type, stand age and measurement time (Table 2).

The seasonal dynamics of AR and HR were dependent on ST in the ~15-year-old stand, which could explain the 22% and 69% variation in AR and HR, respectively for larch (Fig. 6a–6d). Additionally, this could explain the 68% and 61% variation in AR and HR (respectively) for Mongolia pine (Fig. 7a–7d). We found a higher  $Q_{10}$  for HR compared with AR in larch (3.85 vs. 2.98). In contrast, Mongolia pine showed a similar  $Q_{10}$  for HR compared with AR (2.61 vs. 2.76). As the stand age increased, the  $Q_{10}$  of both HR (3.85, ~15-year-old vs. 5.07, ~35-year-old) and AR (2.98, ~15-year-old vs. 3.23, ~35 years) increased in larch (Fig. 5a, 5b). For Mongolia pine, the  $Q_{10}$  of HR increased (2.61, ~15-year-old vs. 2.71, ~35-year-old), but AR showed no significant relationship with ST in ~35-year-old stand (Fig. 7e). In ~15-year-old stand, neither HR nor AR was controlled by SWC, irrespective of forest type. As stand age increased, HR correlated with SWC in Mongolia pine (Fig. 7f). In contrast, larch AR was significantly

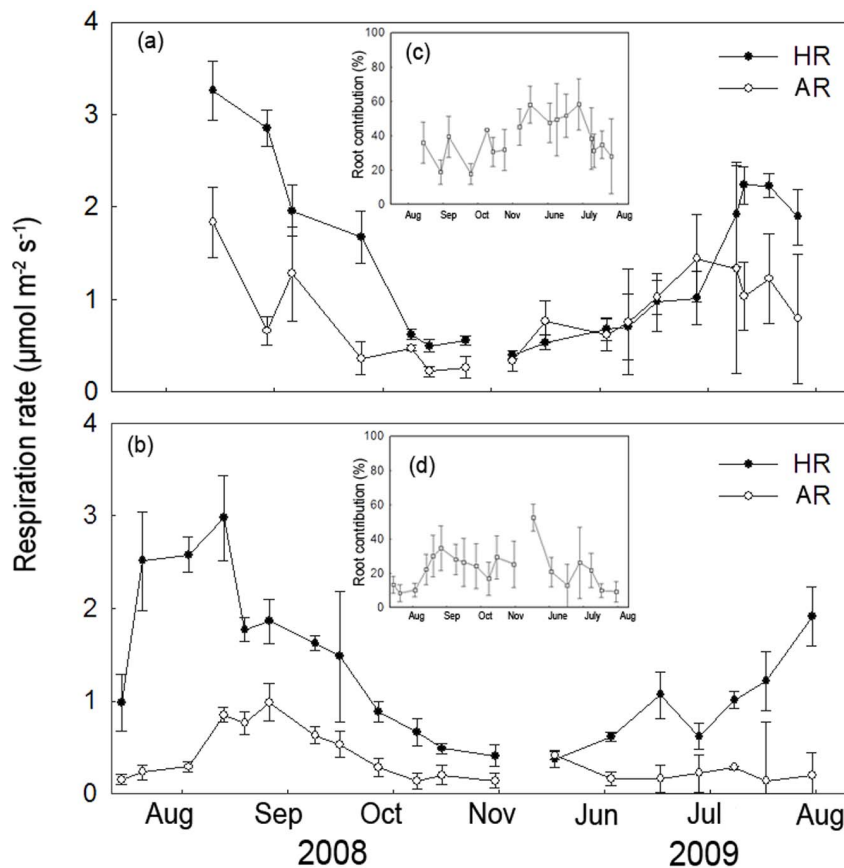

**Figure 5. Seasonal changes in autotrophic and heterotrophic components of soil respiration (SR) for different aged stands of *Pinus sylvestris*.** Autotrophic respiration (AR) and heterotrophic respiration (HR) in ~15-year-old (a) and ~35-year-old stands (b) are shown from August 2008 to August 2009. Seasonal changes in the contribution of AR to SR are shown in inserted figures for ~15-year-old (c) and ~35-year-old (d) stands. The data in the ~25-year-old stand were absent because of the artificially damaged collars for separating AR and HR during the experiments. doi:10.1371/journal.pone.0080937.g005

related with SWC ( $P < 0.01$ , Fig. 6g). The dependence of AR on NDVI only occurred in ~35-year-old Mongolia pine (Fig. 6d, 6h, Fig. 7d, 7h).

## Discussion

### Drivers of seasonal dynamics for soil respiration (SR)

We hypothesized (1) that ST, SWC and NDVI will impose significant effects on the seasonal dynamics of SR across different aged stands, irrespective of forest type. However, we found that the seasonal dynamics of SR were principally driven by ST and SWC, not by NDVI, across different aged stands, irrespective of forest type. Forest SR is closely related to gross primary productivity (GPP) and leaf area index (LAI) [52,53], suggesting a coupling between the  $\text{CO}_2$  assimilation in the forest canopy and  $\text{CO}_2$  released from the soil. NDVI has shown a close correlation with GPP [54,55] and LAI [56]. As a convenient proxy for productivity, NDVI was expected to be positively associated with AR because of the dependence on photosynthesis [52]. We expected a positive relationship between SR and NDVI based on the higher contribution of AR to SR (Figs. 4, 5). We found strong positive relationships between SR and NDVI (Fig. S3); however, these relationships disappeared when we used  $R_{15}$  for both forest types across three different aged stands (Fig. S1). These results imply that the correlation between SR and NDVI may occur because of the significant relationship between ST and NDVI (Fig.

S4). Our results emphasized the significance of ST and SWC on simulating total SR for both forest types across different aged stands. Our results were inconsistent with recent evidence showing that SR was closely related to canopy photosynthesis at various timescales [57,58]. The discrepancies may occur because NDVI measures integrated past photosynthetic activity rather than present photosynthetic activity [59]. In addition, differences may have occurred because the seasonal change in foliar photosynthetic capacity and NDVI are not necessarily coincidence [53]. Moreover, the temporal dynamics of SR were reported to lag behind those of NDVI [33,60], so our monthly SR measurements may not reflect the real relationship between these two variables. Therefore, high-frequency measurements should be conducted to explore the control of temporal dynamics in SR.

### Drivers of seasonal dynamics of heterotrophic respiration (HR) and autotrophic respiration (AR)

In our second hypothesis, we expected greater sensitivity in HR to variation in ST compared with AR. However, we observed a mixed result. In ~15-year-old stand, we found a higher  $Q_{10}$  for HR compared with AR in larch and a similar  $Q_{10}$  for AR with HR in Mongolia pine (Fig. 6a, 7a). The lower  $Q_{10}$  of AR compared with HR in larch may be attributed to differing plant physiology and phenology in Mongolia pine. Deciduous trees are time-limited each year to photosynthesize, allocating more carbon for aboveground growth during summer when ST is highest [26].



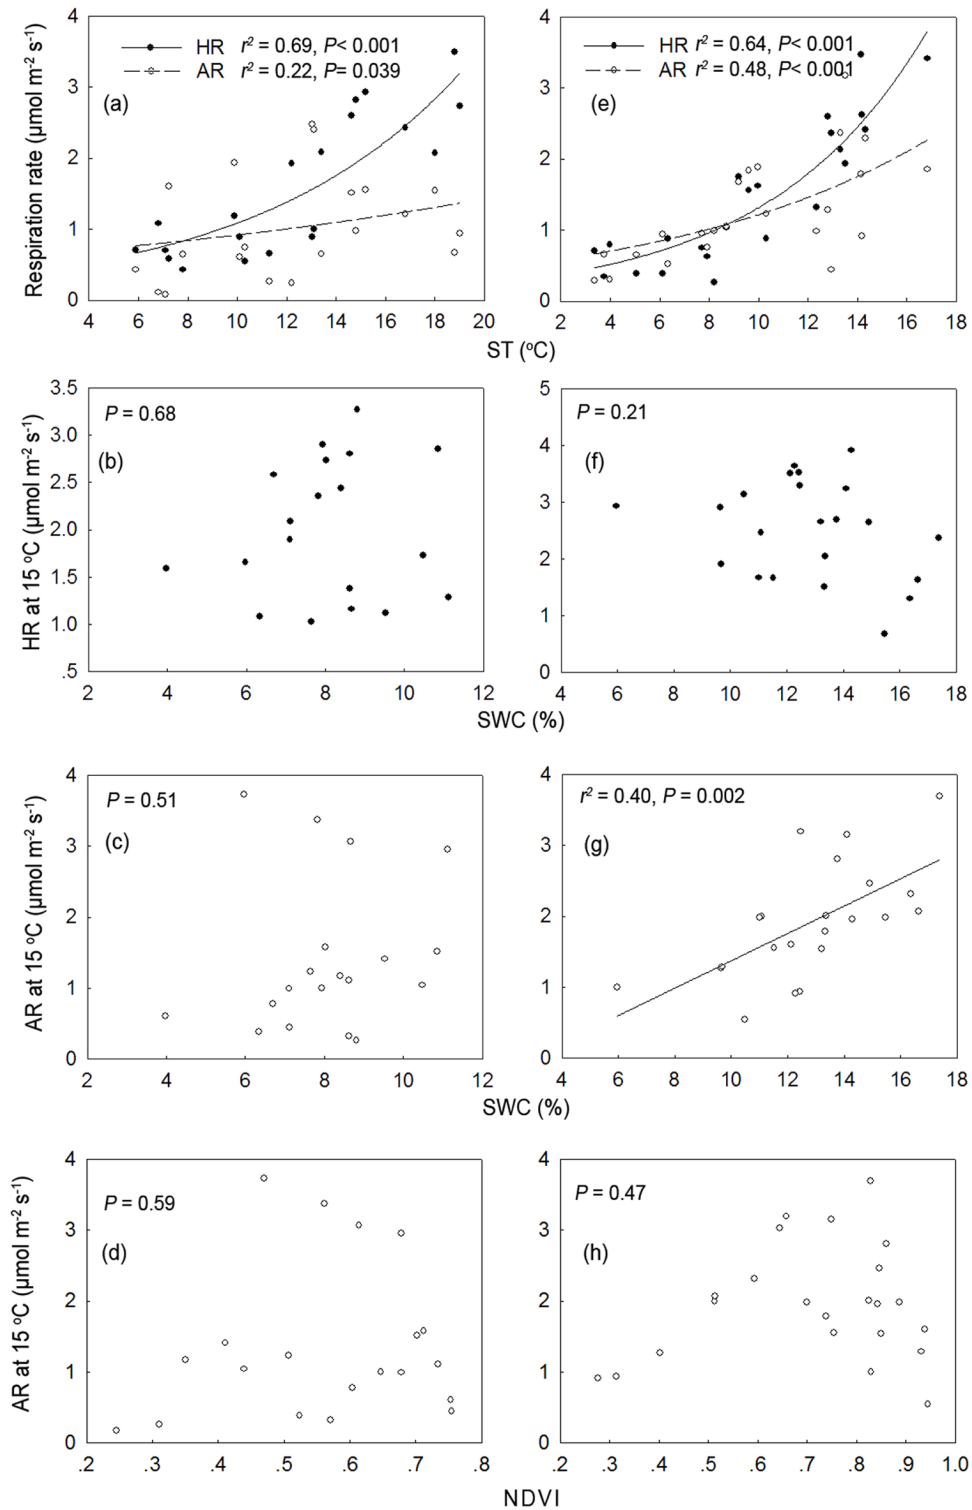

**Figure 6. Relationships between autotrophic respiration (AR) and heterotrophic respiration (HR) and environmental factors across different aged stands of *Larix principis*.** The relationships are shown between autotrophic respiration (AR) and heterotrophic respiration (HR) and soil temperature (ST) for ~15-year-old (a), ~35-year-old stands (e), between soil water content (SWC) and HR<sub>15</sub> for ~15-year-old (b), ~35-year-old stands (f), between SWC and AR<sub>15</sub> for ~15-year-old (c) and ~35-year-old stands (g), and between NDVI and AR<sub>15</sub> for ~15-year-old (d), and ~35-year-old (h) stands of *Larix principis*. The data in the ~25-year-old stand were absent because of the artificially damaged collars for separating AR and HR during the experiments.

doi:10.1371/journal.pone.0080937.g006

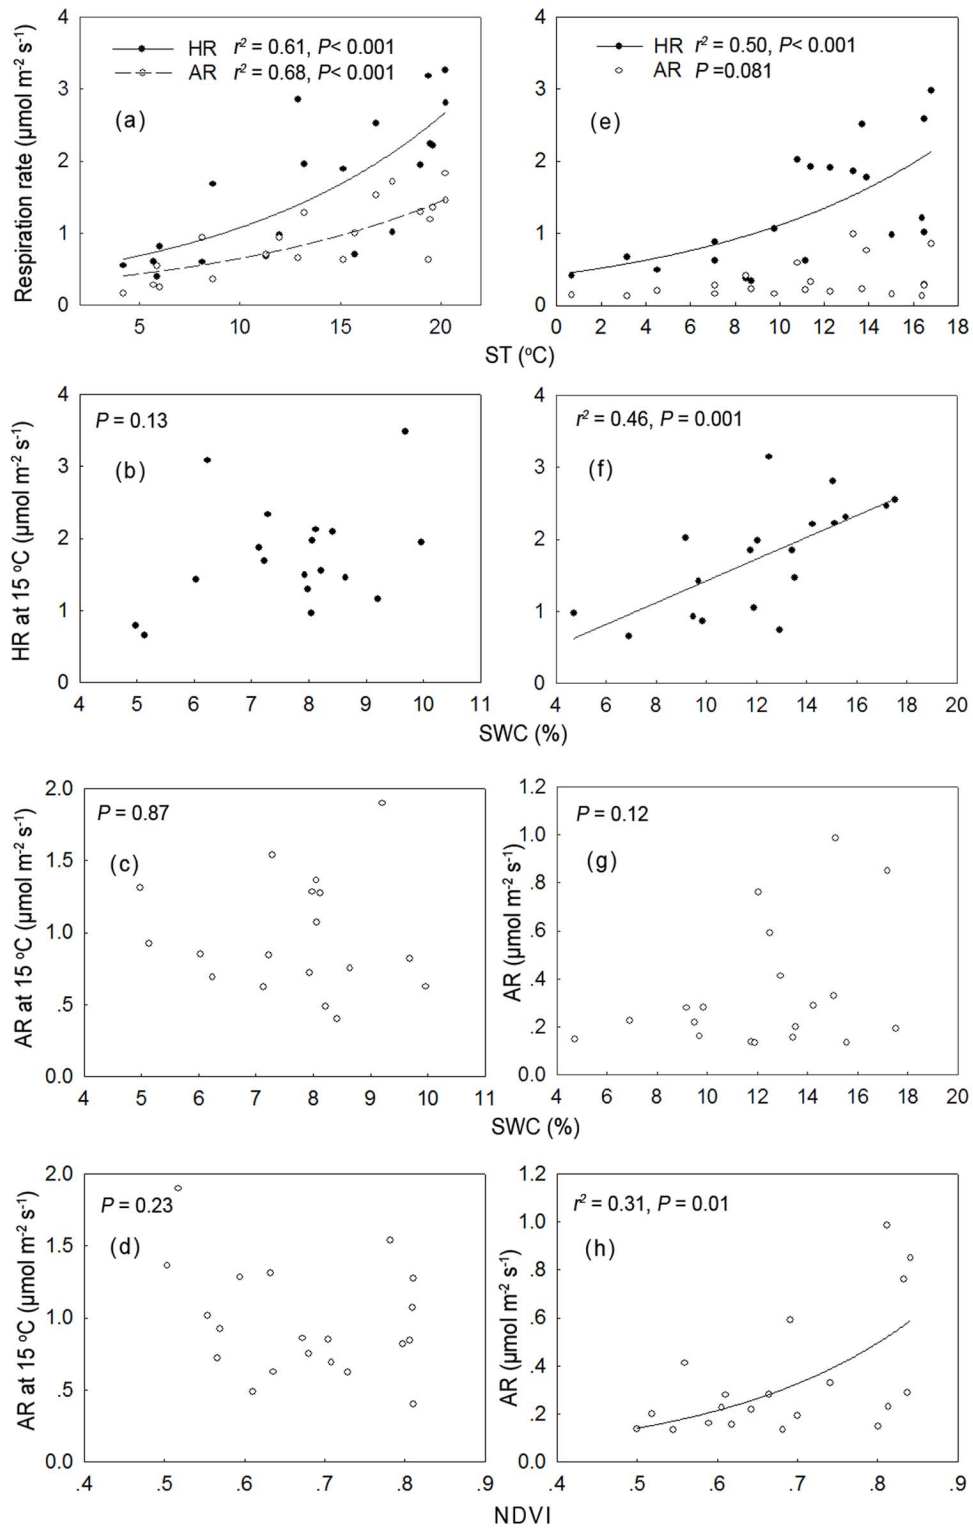

**Figure 7. Relationships between autotrophic respiration (AR) and heterotrophic respiration (HR) and environmental factors across different aged stands of *Pinus sylvestris*.** The relationships are shown between autotrophic respiration (AR) and heterotrophic respiration (HR) and soil temperature (ST) for ~15-year-old (a), ~35-year-old stands (e), between soil water content (SWC) and HR<sub>15</sub> for ~15 years (b) and ~35 years (f); between SWC and AR<sub>15</sub> for ~15-year-old (c) and ~35-year-old stands (g); between NDVI and AR<sub>15</sub> for ~15-year-old stand (d), and between NDVI and AR for ~35-year-old stands (h) of *Pinus sylvestris*. The data in the ~25-year-old stand were absent because of the artificially damaged collars for separating AR and HR during the experiments.  
doi:10.1371/journal.pone.0080937.g007

Furthermore, peak root growth commonly occurs in spring and autumn for coniferous forests [61,62]. We observed the contribution of AR to total SR was higher in spring and autumn for larch. Therefore, the seasonal dynamics of AR in larch may be connected with those of root growth, resulting in lower  $Q_{10}$  of AR compared with HR. In contrast, Mongolia pine can photosynthesize year-round with little investment required in highly efficient photosynthetic activity. Consequently, the dynamics of AR in Mongolia pine stands may be associated with higher metabolic demand during leaf production [63]. We also found maximal AR in early summer in Mongolia pine (Fig. 5a), which was consistent with Lee *et al.* (2010), who observed maximal contribution of AR to total SR in summer for evergreen forest and in autumn for deciduous forest [64].

According to our second hypothesis, we expected that the seasonal dynamics of AR were more dependent on NDVI rather than HR. However, we found that AR was significantly affected by NDVI only in ~35-year-old Mongolia pine (Fig. 7h). We did not observe a significant relationship between AR and NDVI in larch, possibly because of greater carbon allocation in deciduous forest to storage and reproductive functions compared with evergreen forests [26]. The relationship between AR and NDVI in deciduous trees was more dependent on seasonal accumulation and consumption of stored C compared with evergreen trees [65]. The absence of a significant relationship in ~15-year-old Mongolia pine stand may be attributed to the soil water deficit, inducing a selection pressure favoring trees presenting high storage capability for reserve compounds to combat this stress [66,67]. Moreover, the carbon balance between growth and storage remained constant between age classes in evergreen forest [26]. Our results suggested that the correlation between AR and NDVI was dependent upon stand age, and this stand age-related effect was forest type-dependent.

We expected a higher dependence of HR on SWC compared with AR because AR was reported as less responsive to water variability compared with HR [68,69]. However, we found in ~15-year-old stand that neither HR nor AR was controlled by SWC, irrespective of forest type. This may occur because of the narrower variation in SWC in young forest characterized by high soil water evaporation [70]. With increased stand age, HR correlated with SWC in Mongolia pine (Fig. 7f). In contrast, larch AR was significantly related to SWC (Fig. 6g). Similar observations were reported by Lee *et al.* (2010), who found a significant correlation between AR and SWC in *Quercus*-dominated deciduous stand, not evergreen stands of *Abies holophylla*. One possible reason for this difference between Mongolia pine and larch in the dependence of AR and HR on SWC may be associated with reduced root longevity of deciduous tree species (<1 year) compared with evergreen species (<1–12 years) [71,72]. Higher turnover rates in deciduous tree roots may induce a rapid change in response to environmental fluctuations compared with evergreen trees. Therefore, our results suggest the response of AR and HR to SWC depended on stand age, with the effects of stand age dependent on forest type.

## References

- Bond-Lamberty B, Thomson A (2010) Temperature-associated increases in the global soil respiration record. *Nature* 464: 579–582.
- Wang W, Chen W, Wang S (2010) Forest soil respiration and its heterotrophic and autotrophic components: Global patterns and responses to temperature and precipitation. *Soil Biology & Biochemistry* 42: 1236–1244.
- Zhou YM, Li MH, Cheng XB, Wang CG, Fan AN, et al. (2010) Soil respiration in relation to photosynthesis of *quercus mongolica* trees at elevated CO<sub>2</sub>. *Plos one* 5:e15134. doi:10.1371/journal.pone.0015134.

## Conclusions

In summary, we tested the effects of forest type on SR, AR and HR across different aged stands in the same location to prevent confounding from climatic and edaphic conditions. We observed that ST and SWC were significant factors controlling the seasonal dynamics of total SR, irrespective of forest age and type. However, the response of AR and HR to ST, SWC and NDVI differed across various aged stands, with the effects of stand age dependent on the forest type. These results suggest that in stimulating the response of forest carbon efflux to environmental changes, we should consider the effects of stand age and the influence of forest type on this age-related trend. Furthermore, our study emphasized considering the response of HR and AR to environmental changes separately when predicting the response of soil carbon efflux in different aged forests to global climate changes. Future research should attempt an in-depth understanding of the effects of more functional types on carbon efflux across different aged stands.

## Acknowledgments

We thank two anonymous reviewers for their constructive suggestions on an early version of this manuscript.

## Supporting Information

**Figure S1** Relationships between soil respiration at 15°C (SR<sub>15</sub>) and NDVI across different aged stands. The relationships are shown for ~15 (a), ~25 (b), ~35-year-old stands (c) of *Larix principis*, ~15 (d), ~25 (e), and ~35 year-old stands (f) of *Pinus sylvestris*. (TIF)

**Figure S2** Relationships between soil respiration at 15°C (SR<sub>15</sub>) and soil water content (SWC) across different aged stands. The relationships are shown for ~15 (a), ~25 (b) and ~35-year-old stands (c) of *Larix principis*, ~15 (d), ~25 (e) and ~35-year-old stands (f) of *Pinus sylvestris*. (TIF)

**Figure S3** Relationships between soil respiration (SR) and NDVI across different aged stands. The relationships are shown for ~15 (a), ~25 (b) and ~35-year-old stands (c) of *Larix principis*, ~15 (d), ~25 (e) and ~35-year-old stands (f) of *Pinus sylvestris*. (TIF)

**Figure S4** Relationships between ST (soil temperature at 5 cm depth) and NDVI for non-growing season (dotted line) and growing season (solid line). The relationships are shown for ~15 (a) and ~25-year-old stands (b) of *Larix principis*, ~15 (c), ~25 (d), and ~35-year-old stands (e) of *Pinus sylvestris*. The data of ~35-year-old stands *L. principis* were absent because of the damage of StowAway loggers inserted in the soil. (TIF)

## Author Contributions

Conceived and designed the experiments: WW WC. Performed the experiments: WW WC. Analyzed the data: WW WZ WC. Contributed reagents/materials/analysis tools: WW YY HZ. Wrote the paper: WW WZ WC.

4. Hanson PJ, Edwards NT, Garten CT, Andrews JA (2000) Separating root and soil microbial contributions to soil respiration: A review of methods and observations. *Biogeochemistry* 48: 115–146.
5. Subke J-A, Inglima I, Cotrufo MF (2006) Trends and methodological impacts in soil CO<sub>2</sub> efflux partitioning: A meta-analytical review. *Global Change Biology* 12: 921–943.
6. Bonan GB (2008) Forests and climate change: Forcings, feedbacks, and the climate benefits of forests. *Science* 320: 1444–1449.
7. Luysaert S, Schulze ED, Boerner A, Knohl A, Hessenmoeller D, et al. (2008) Old-growth forests as global carbon sinks. *Nature* 455: 213–215.
8. Cox PM, Betts RA, Jones CD, Spall SA, Totterdell JJ (2000) Acceleration of global warming due to carbon-cycle feedbacks in a coupled climate model. *Nature* 408: 184–187.
9. Davidson EA, Janssens IA (2006) Temperature sensitivity of soil carbon decomposition and feedbacks to climate change. *Nature* 440: 165–173.
10. Mahecha MD, Reichstein M, Carvalhais N, Lasslop G, Lange H, et al. (2010) Global convergence in the temperature sensitivity of respiration at ecosystem level. *Science* 329: 838–840.
11. Pregitzer KS, Euskirchen ES (2004) Carbon cycling and storage in world forests: biome patterns related to forest age. *Global Change Biology* 10: 2052–2077.
12. Zhou G, Liu S, Li Z, Zhang D, Tang X, et al. (2006) Old-growth forests can accumulate carbon in soils. *Science* 314: 1417–1417.
13. Yang Y, Luo Y, Finzi AC (2011) Carbon and nitrogen dynamics during forest stand development: a global synthesis. *New Phytologist* 190: 977–989.
14. Hasselquist NJ, Allen MF, Santiago LS (2010) Water relations of evergreen and drought-deciduous trees along a seasonally dry tropical forest chronosequence. *Oecologia* 164: 881–890.
15. Saiz G, Byrne KA, Butterbach-Bahl K, Kiese R, Blujdeas V, et al. (2006) Stand age-related effects on soil respiration in a first rotation Sitka spruce chronosequence in central Ireland. *Global Change Biology* 12: 1007–1020.
16. Tang J, Bolstad PV, Martin JG (2009) Soil carbon fluxes and stocks in a Great Lakes forest chronosequence. *Global Change Biology* 15: 145–155.
17. Coomes DA, Holdaway RJ, Kobe RK, Lines ER, Allen RB (2012) A general integrative framework for modelling woody biomass production and carbon sequestration rates in forests. *Journal of Ecology* 100: 42–64.
18. Smith DR, Kaduk JD, Balzter H, Wooster MJ, Mottram GN, et al. (2010) Soil surface CO<sub>2</sub> flux increases with successional time in a fire scar chronosequence of Canadian boreal jack pine forest. *Biogeosciences* 7: 1375–1381.
19. Odum EP (1969) Strategy of ecosystem development. *Science* 164: 262–270.
20. Martin JG, Bolstad PV (2005) Annual soil respiration in broadleaf forests of northern Wisconsin: influence of moisture and site biological, chemical, and physical characteristics. *Biogeochemistry* 73: 149–182.
21. Pypker TG, Fredeen AL (2003) Below ground CO<sub>2</sub> efflux from cut blocks of varying ages in sub-boreal British Columbia. *Forest Ecology and Management* 172: 249–259.
22. Yermakov Z, Rothstein DE (2006) Changes in soil carbon and nitrogen cycling along a 72-year wildfire chronosequence in Michigan jack pine forests. *Oecologia* 149: 690–700.
23. Wang CK, Bond-Lamberty B, Gower ST (2002) Soil surface CO<sub>2</sub> flux in a boreal black spruce fire chronosequence. *Journal of Geophysical Research-Atmospheres* 108: DOI: 10.1029/2001JD000861.
24. Law BE, Sun OJ, Campbell J, Van Tuyl S, Thornton PE (2003) Changes in carbon storage and fluxes in a chronosequence of ponderosa pine. *Global Change Biology* 9: 510–524.
25. Campbell JL, Law BE (2005) Forest soil respiration across three climatically distinct chronosequences in Oregon. *Biogeochemistry* 73: 109–125.
26. Genet H, Breda N, Dufrene E (2010) Age-related variation in carbon allocation at tree and stand scales in beech (*Fagus sylvatica* L.) and sessile oak (*Quercus petraea* (Matt.) Liebl.) using a chronosequence approach. *Tree Physiology* 30: 177–192.
27. Falge E, Baldocchi D, Tenhunen J, Aubinet M, Bakwin P, et al. (2002) Seasonality of ecosystem respiration and gross primary production as derived from FLUXNET measurements. *Agricultural and Forest Meteorology* 113: 53–74.
28. Boone RD, Nadelhoffer KJ, Canary JD, Kaye JP (1998) Roots exert a strong influence on the temperature sensitivity of soil respiration. *Nature* 396: 570–572.
29. Hogberg P, Nordgren A, Buchmann N, Taylor AFS, Ekblad A, et al. (2001) Large-scale forest girdling shows that current photosynthesis drives soil respiration. *Nature* 411: 789–792.
30. Fang CM, Smith P, Moncrieff JB, Smith JU (2005) Similar response of labile and resistant soil organic matter pools to changes in temperature. *Nature* 433: 57–59.
31. Knorr W, Prentice IC, House JI, Holland EA (2005) Long-term sensitivity of soil carbon turnover to warming. *Nature* 433: 298–301.
32. Gong JR, Ge ZW, An R, Duan QW, You X, et al. (2012) Soil respiration in poplar plantations in northern China at different forest ages. *Plant and Soil* 360: 109–122.
33. Oishi AC, Palmroth S, Butnor JR, Johnsen KH, Oren R (2013) Spatial and temporal variability of soil CO<sub>2</sub> efflux in three proximate temperate forest ecosystems. *Agricultural and Forest Meteorology* 171: 256–269.
34. Jassal RS, Black TA, Nesic Z (2012) Biophysical controls of soil CO<sub>2</sub> efflux in two coastal Douglas-fir stands at different temporal scales. *Agricultural and Forest Meteorology* 153: 134–143.
35. Bond-Lamberty B, Wang CK, Gower ST (2004) A global relationship between the heterotrophic and autotrophic components of soil respiration? *Global Change Biology* 10: 1756–1766.
36. Gaumont-Guay D, Black TA, Griffis TJ, Barr AG, Morgenstern K, et al. (2006) Influence of temperature and drought on seasonal and interannual variations of soil, bole and ecosystem respiration in a boreal aspen stand. *Agricultural and Forest Meteorology* 140: 203–219.
37. Moyano FE, Kutsch WL, Rehmann C (2008) Soil respiration fluxes in relation to photosynthetic activity in broad-leaf and needle-leaf forest stands. *Agricultural and Forest Meteorology* 148: 135–143.
38. Kuzuyakov Y, Gavrichkova O (2010) REVIEW: Time lag between photosynthesis and carbon dioxide efflux from soil: a review of mechanisms and controls. *Global Change Biology* 16: 3386–3406.
39. Pang X, Bao W, Zhu B, Cheng W (2013) Responses of soil respiration and its temperature sensitivity to thinning in a pine plantation. *Agricultural and Forest Meteorology* 171: 57–64.
40. Shi WY, Zhang JG, Yan MJ, Yamanaka N, Du S (2012) Seasonal and diurnal dynamics of soil respiration fluxes in two typical forests on the semiarid Loess Plateau of China: Temperature sensitivities of autotrophs and heterotrophs and analyses of integrated driving factors. *Soil Biology and Biochemistry* 52: 99–107.
41. Kurganova I, De Gerenyu VL, Rozanova L, Saponov D, Myakshina T, et al. (2003) Annual and seasonal CO<sub>2</sub> fluxes from Russian southern taiga soils. *Tellus Series B-Chemical and Physical Meteorology* 55: 338–344.
42. Elberling B (2007) Annual soil CO<sub>2</sub> effluxes in the High Arctic: The role of snow thickness and vegetation type. *Soil Biology & Biochemistry* 39: 646–654.
43. Grogan P, Jonasson S (2006) Ecosystem CO<sub>2</sub> production during winter in a Swedish subarctic region: the relative importance of climate and vegetation type. *Global Change Biology* 12: 1479–1495.
44. Gamon JA, Field CB, Goulden ML, Griffin KL, Hartley AE, et al. (1995) Relationships between NDVI, canopy structure, and photosynthesis in 3 Californian vegetation types. *Ecological Applications* 5: 28–41.
45. Jakubauskas ME, Legates DR, Kastens JH (2001) Harmonic analysis of time-series AVHRR NDVI data. *Photogrammetric Engineering and Remote Sensing* 67: 461–470.
46. Verhoef W, Menenti M, Azzali S (1996) A colour composite of NOAA-AVHRR-NDVI based on time series analysis (1981–1992). *International Journal of Remote Sensing* 17: 231–235.
47. Azzali S, Menenti M (2000) Mapping vegetation-soil-climate complexes in southern Africa using temporal Fourier analysis of NOAA-AVHRR NDVI data. *International Journal of Remote Sensing* 21: 973–996.
48. Vogel JG, Valentine DW (2005) Small root exclusion collars provide reasonable estimates of root respiration when measured during the growing season of installation. *Canadian Journal of Forest Research* 35: 2112–2117.
49. Wan SQ, Hui DF, Wallace L, Luo YQ (2005) Direct and indirect effects of experimental warming on ecosystem carbon processes in a tallgrass prairie. *Global Biogeochemical Cycles* 19: DOI:10.1029/2004GB002315.
50. Zhou X, Wan S, Luo Y (2007) Source components and interannual variability of soil CO<sub>2</sub> efflux under experimental warming and clipping in a grassland ecosystem. *Global Change Biology* 13: 761–775.
51. Migliavacca M, Reichstein M, Richardson AD, Colombo R, Sutton MA, et al. (2011) Semiempirical modeling of abiotic and biotic factors controlling ecosystem respiration across eddy covariance sites. *Global Change Biology* 17: 390–409.
52. Janssens IA, Lanckreijer H, Matteucci G, Kowalski AS, Buchmann N, et al. (2001) Productivity overshadows temperature in determining soil and ecosystem respiration across European forests. *Global Change Biology* 7: 269–278.
53. Ide R, Oguma H (2010) Use of digital cameras for phenological observations. *Ecological Informatics* 5: 339–347.
54. Ahrends HE, Etzold S, Kutsch WL, Stoeckli R, Bruegger R, et al. (2009) Tree phenology and carbon dioxide fluxes: use of digital photography at for process-based interpretation the ecosystem scale. *Climate Research* 39: 261–274.
55. Richardson AD, Braswell BH, Hollinger DY, Jenkins JP, Ollinger SV (2009) Near-surface remote sensing of spatial and temporal variation in canopy phenology. *Ecological Applications* 19: 1417–1428.
56. Tagesson T, Eklundh L, Lindroth A (2009) Applicability of leaf area index products for boreal regions of Sweden. *International Journal of Remote Sensing* 30: 5619–5632.
57. Ekblad A, Hogberg P (2001) Natural abundance of <sup>13</sup>C in CO<sub>2</sub> respired from forest soils reveals speed of link between tree photosynthesis and root respiration. *Oecologia* 127: 305–308.
58. Liu Q, Edwards NT, Post WM, Gu L, Ledford J, et al. (2006) Temperature-independent diel variation in soil respiration observed from a temperate deciduous forest. *Global Change Biology* 12: 2136–2145.
59. Gamon JA, Field CB, Goulden ML, Griffin KL, Hartley AE, et al. (1995) Relationships between NDVI, canopy structure, and photosynthesis in 3 Californian vegetation types. *Ecological Applications* 5: 28–41.
60. Bond-Lamberty B, Bunn AG, Thomson AM (2012) Multi-year lags between forest browning and soil respiration at high Northern latitudes. *Plos one* 7: e50441.
61. Cisneros-Dozal LM, Trumbore S, Hanson PJ (2006) Partitioning sources of soil-respired CO<sub>2</sub> and their seasonal variation using a unique radiocarbon tracer. *Global Change Biology* 12: 194–204.
62. Scott-Denton LE, Rosenstiel TN, Monson RK (2006) Differential controls by climate and substrate over the heterotrophic and rhizospheric components of soil respiration. *Global Change Biology* 12: 205–216.
63. Liang N, Hirano T, Zheng ZM, Tang J, Fujinuma Y (2010) Soil CO<sub>2</sub> efflux of a larch forest in northern Japan. *Biogeosciences* 7: 3447–3457.

64. Lee N-y, Koo J-W, Noh NJ, Kim J, Son Y (2010) Seasonal variation in soil CO<sub>2</sub> efflux in evergreen coniferous and broad-leaved deciduous forests in a cool-temperate forest, central Korea. *Ecological Research* 25: 609–617.
65. Kuptz D, Matyssek R, Grams TEE (2011) Seasonal dynamics in the stable carbon isotope composition delta<sup>13</sup>C from non-leafy branch, trunk and coarse root CO<sub>2</sub> efflux of adult deciduous (*Fagus sylvatica*) and evergreen (*Picea abies*) trees. *Plant Cell and Environment* 34: 363–373.
66. Yordanov I, Velikova V, Tsonev T (2000) Plant responses to drought, acclimation, and stress tolerance. *Photosynthetica* 38: 171–186.
67. Chen G, Yang Y, Guo J, Xie J, Yang Z (2011) Relationships between carbon allocation and partitioning of soil respiration across world mature forests. *Plant Ecology* 212: 195–206.
68. Carbone MS, Winston GC, Trumbore SE (2008) Soil respiration in perennial grass and shrub ecosystems: Linking environmental controls with plant and microbial sources on seasonal and diel timescales. *Journal of Geophysical Research-Biogeosciences* 113: DOI: 10.1029/2007JG000611.
69. Muhr J, Borken W (2009) Delayed recovery of soil respiration after wetting of dry soil further reduces C losses from a Norway spruce forest soil. *Journal of Geophysical Research-Biogeosciences* 114: DOI: 10.1029/2009JG000998.
70. Drake P, Mendham D, White D, Ogden G, Dell B (2012) Water use and water-use efficiency of coppice and seedling *Eucalyptus globulus* Labill.: a comparison of stand-scale water balance components. *Plant and Soil* 350: 221–235.
71. Vogt KA, Grier CC, Vogt DJ (1986) Production, turnover, and nutrient dynamics of aboveground and belowground detritus of world forests. *Advances in Ecological Research* 15: 303–377.
72. Lyr H, Hoffman G (1967) Growth rates and growth periodicity of tree roots. *International Review of Forestry Research* 2: 181–236.
